# Supplementary material for: Brain Plasticity in Neonatal Brachial Plexus Palsies: Quantification and Comparison with Adults Brachial Plexus Injuries
Source: Research Square preprint supplement (doi:10.21203/rs.3.rs-3106823/v1), 2023-06-30
Supplement: Supplementary file 1 [file 9acea8935bb68898b2a7dfd9.docx]

Tables & Figures

Table 1: Plasticity Grading Scale (PGS) after Nerve Transfer

| GRADE | Target muscle contraction↔ motor program activation | MRC of target muscle contraction  with DONOR command | MRC of target muscle contraction  With ACCEPTOR command |
| --- | --- | --- | --- |
| I | Exclusively donor (no plasticity) | M4 | M0 |
| II | Via donor and acceptor (poor plasticity) | M2, M3 or M4 | M4 |
| III | Subtle via donor, predominantly via acceptor (good plasticity) | M1 | M4 |
| IV | Exclusively acceptor (excellent plasticity) | M0 | M4 |

| Table 2: The Rehabilitation Quality Scale (RQS) used to quantify adherence to and the quality of a patient’s postoperative rehabilitation program  Score Description   - 1  No rehabilitation therapy at all or less than once a week - 2  Rehabilitation therapy more than once per week, but not at a specialized neuro-rehabilitation center - 3  Good adherence with the entire rehabilitation program, but not at a specialized neuro-rehabilitation center; periodically assessed at a specialized neuro-rehabilitation center - 4  Patient adheres perfectly to the entire rehabilitation program at a specialized neuro-rehabilitation center |
| --- |

Table 3: Demographic characteristics of patients of the sample

| Patient Group | Variable | Mean | SD | Range |
| --- | --- | --- | --- | --- |
| NNBPP | Age (years) | 28.22 | 12.41 | 3-69 |
| (N = 153) | % males | 92.2% |  |  |
|  | Time to surgery (months) | 6.37 | 3.03 | 1 - 19 |
|  | Duration of follow-up (months) | 53.93 | 35.13 | 12 - 182 |
|  | Compliance score | 3.04 | 0.76 | 2 - 4 |
|  | Plasticity score | 3.05 | 0.65 | 1 - 4 |
| NBPP | Age (months) | 9 | 5.42 | 4 – 23 |
| (N = 38) | % males | 47.4% |  |  |
|  | Time to surgery (months) | 9.18 | 5.06 | 3 - 23 |
|  | Duration of follow-up (months) | 44.39 | 31.58 | 12 - 132 |
|  | Compliance score | 2.76 | 0.97 | 1 - 4 |
|  | Plasticity score | 4.00 | 0.00 | 4 - 4 |

| | Table 4: Nerve transfers employed in NNBPP (n=153) patients | |  | | --- | --- | --- | | Nerve transfer | Number | Mean Plasticity Grading Scale | | Phrenic nerve for elbow flexion | 44 | 2.57 | | Spinal accessory nerve for elbow flexion | 40 | 2.95 | | Oberlin (double or single) | 44 | 3.27 | | Triceps to Axillary | 25 | 3.15 | | Total group | 153 | 3.05 |   Table 5: Nerve transfers (n=38) employed in NBPP patients (n=35) | |  |
| --- | --- | --- | --- | --- | --- | --- | --- | --- | --- | --- | --- | --- | --- | --- | --- | --- | --- | --- | --- | --- | --- | --- | --- |
| Nerve transfer | Number | Mean Plasticity Grading Scale |
| Ulnar fascicle to MCN biceps branch | 22 | 4 |
| SAN to SS | 3 | 4 |
| Spinal accessory nerve for elbow flexion | 4 | 4 |
| ICN to MCN | 6 | 4 |
| Triceps branches to Axillary nerve (anterior division) | 3 | 4 |

Table 6: Comparison of NBPP with NBPP patients

|  | Subject group |  | Different | Different |
| --- | --- | --- | --- | --- |
| Variable | NNBPP | NBPP | means | distributions |
| Time to surgery | 6.37 | 9.18 | p < 0.001 | p < 0.001 |
| Duration of follow-up | 53.93 | 44.39 | p = 0.050 | p = 0.068 |
| Compliance score | 3.04 | 2.76 | p = 0.83 | p = 0.071 |
| Plasticity Grading Scale | 3.05 | 4.00 | p < 0.001 | p < 0.0005 |

| Table 7: Nerve transfers employed in BPI (n=153) and plasticity score (PGS) achieved | | | |  | | |  | |
| --- | --- | --- | --- | --- | --- | --- | --- | --- |
| Nerve transfer | | Total number of cases | Number of cases achieving grades (in PGS) | | | | | | | |
| 1 | 2 | | 3 | 4 | | Mean | |
| Phrenic to (ADUT, LC, MCN, BB) | | 44 | 0 | 11 | | 33 | 0 | | 2.57 | |
| Spinal accessory to MCN | | 40 | 1 | 4 | | 34 | 1 | | 2.95 | |
| Median and/or Ulnar fascicle to MCN | | 44 | 0 | 4 | | 20 | 20 | | 3.27 | |
| Triceps to axillary | | 25 | 0 | 2 | | 16 | 7 | | 3.15 | |
